# Supplementary material for: Integration of full-length Iso-Seq, Illumina RNA-Seq, and flavor testing reveals potential differences in ripened fruits between two Passiflora edulis cultivars
Source: PeerJ. 2024 Sep 11;12:e17983. doi: 10.7717/peerj.17983 (PMC11401511; doi:10.7717/peerj.17983)
Supplement: Supplemental Information 2 [file peerj-12-17983-s002.xlsx]

## Sheet: Table S1
Table S1 data statistics of all subreads
Sample	Total_bases(Gbp)	Total_number	Minimum_length	Average_length	Maximum_length	N50
P. edulis	34.49	28953014	51 bp	1192 bp	221656 bp	1315 bp
