# Supplementary material for: Integration of full-length Iso-Seq, Illumina RNA-Seq, and flavor testing reveals potential differences in ripened fruits between two Passiflora edulis cultivars
Source: PeerJ. 2024 Sep 11;12:e17983. doi: 10.7717/peerj.17983 (PMC11401511; doi:10.7717/peerj.17983)
Supplement: Supplemental Information 3 [file peerj-12-17983-s003.xlsx]

## Sheet: Table S2
Table S2 data statistics of CCS sequences
Sample	Total_bases(bp)	Total_number	Minimum_length	Average_length	Maximum_length	N50	Average_accuracy	Average_passes
P. edulis	585285930	427342	102 bp	1370 bp	9838 bp	1517 bp	0.99785	62
