# Supplementary material for: Integration of full-length Iso-Seq, Illumina RNA-Seq, and flavor testing reveals potential differences in ripened fruits between two Passiflora edulis cultivars
Source: PeerJ. 2024 Sep 11;12:e17983. doi: 10.7717/peerj.17983 (PMC11401511; doi:10.7717/peerj.17983)
Supplement: Supplemental Information 4 [file peerj-12-17983-s004.xlsx]

## Sheet: Table S3
Table S3 Results of FLNC identification
Sample	FL reads numble	FLNC reads numble	polyA FLNC reads numble
P. edulis	366054	358883	358519
