# Supplementary material for: Integration of full-length Iso-Seq, Illumina RNA-Seq, and flavor testing reveals potential differences in ripened fruits between two Passiflora edulis cultivars
Source: PeerJ. 2024 Sep 11;12:e17983. doi: 10.7717/peerj.17983 (PMC11401511; doi:10.7717/peerj.17983)
Supplement: Supplemental Information 5 [file peerj-12-17983-s005.xlsx]

## Sheet: Table S4
Table S4 data statistics of FLNC sequences
Sample	Total_bases(bp)	Total_number	Minimum_length	Average_length	Maximum_length	N50
P. edulis	45429458	34457	200 bp	1319 bp	7779 bp	1500 bp
