# Supplementary material for: Integration of full-length Iso-Seq, Illumina RNA-Seq, and flavor testing reveals potential differences in ripened fruits between two Passiflora edulis cultivars
Source: PeerJ. 2024 Sep 11;12:e17983. doi: 10.7717/peerj.17983 (PMC11401511; doi:10.7717/peerj.17983)
Supplement: Supplemental Information 6 [file peerj-12-17983-s006.xlsx]

## Sheet: Table S5
Table S5 data statistics of final transcripts and isoforms
sequence	Total_bases(bp)	Total_number	Minimum_length	Average_length	Maximum_length	N50
transcripts	45429458	34457	200 bp	1319 bp	7779 bp	1500 bp
isoform	23279287	15913	209 bp	1463 bp	7779 bp	1648 bp
