# Supplementary material for: Integration of full-length Iso-Seq, Illumina RNA-Seq, and flavor testing reveals potential differences in ripened fruits between two Passiflora edulis cultivars
Source: PeerJ. 2024 Sep 11;12:e17983. doi: 10.7717/peerj.17983 (PMC11401511; doi:10.7717/peerj.17983)
Supplement: Supplemental Information 7 [file peerj-12-17983-s007.xlsx]

## Sheet: Table S6
Table S6 Statistics of Illumina RNA-Seq Data
Sample	Replicates	Raw Reads	Clean Reads	Clean Bases	coverage	Power	Error rates(%)	Q20(%)	Q30(%)	GC Content(%)
GH	rep1	46272564	45997812	6.9G	153.71	0.91	0.03	97.5	92.86	45.91
	rep2	44466104	44208912	6.63G	147.09	0.908	0.03	97.5	92.86	46.17
	rep3	52506282	52207010	7.83G	174.43	0.911	0.03	97.65	93.16	46.13
TN	rep1	56999250	56673314	8.5G	189.35	0.911	0.03	97.67	93.22	46.12
	rep2	50912356	50616536	7.59G	169.08	0.91	0.03	97.66	93.2	45.86
	rep3	40693592	40450552	6.07G	135.22	0.908	0.03	97.45	92.77	46.59
