# Supplementary material for: Integration of full-length Iso-Seq, Illumina RNA-Seq, and flavor testing reveals potential differences in ripened fruits between two Passiflora edulis cultivars
Source: PeerJ. 2024 Sep 11;12:e17983. doi: 10.7717/peerj.17983 (PMC11401511; doi:10.7717/peerj.17983)
Supplement: Supplemental Information 8 [file peerj-12-17983-s008.xlsx]

## Sheet: Table S7
Table S7 Mapping Stat of Illumina RNA-Seq Data
Cultivar	replicates	Sample name	Total PE Reads	Total mapping rate	Multiple mapping rate
P. edulis	rep1	GH-1	22998906	17,586,333(76.47%)	10,730,802(46.66%)
P. edulis	rep2	GH-2	22104456	17,691,108(80.03%)	11,123,034(50.32%)
P. edulis	rep3	GH-3	26103505	21,016,386(80.51%)	13,481,202(51.65%)
P. hybrid	rep1	TN-1	28336657	22,870,497(80.71%)	15,104,959(53.31%)
P. hybrid	rep2	TN-2	25308268	19,003,787(75.09%)	11,338,477(44.80%)
P. hybrid	rep3	TN-3	20225276	15,634,523(77.30%)	9,215,928(45.57%)
