# Supplementary material for: Integration of full-length Iso-Seq, Illumina RNA-Seq, and flavor testing reveals potential differences in ripened fruits between two Passiflora edulis cultivars
Source: PeerJ. 2024 Sep 11;12:e17983. doi: 10.7717/peerj.17983 (PMC11401511; doi:10.7717/peerj.17983)
Supplement: Supplemental Information 9 [file peerj-12-17983-s009.xlsx]

## Sheet: Sheet1
Table S8 Raw data for the content of influencing indicators
	Replicates	GH-1	TN-1
Total Sugars( g/100g)	rep1	6.93	7.16
	rep2	6.61	6.04
	rep3	6.48	8.41
	rep4	6.4	7.69
	rep5	6.96	7.52
	rep6	5.49	8.16
Total acidity( g/kg)	rep1	18.7	26
	rep2	17	24.3
	rep3	20.6	23.6
	rep4	19.3	27.1
	rep5	22.1	25.9
	rep6	19.9	24.5
Vitamin C( mg/100g)	rep1	4.85	13.2
	rep2	4.14	9.09
	rep3	4.4	9.27
	rep4	5.98	15.4
	rep5	8.75	11.7
	rep6	7.52	12.2
Soluble Solids( %)	rep1	12.5	12
	rep2	11	11
	rep3	11.5	12.5
	rep4	13.5	14
	rep5	13	12.5
	rep6	12	10
